# Supplementary material for: Structural and Functional Dissection of the 5′ Region of the Notch Gene in Drosophila melanogaster
Source: PubMed Central journal article supplement (PMC6947440; doi:10.3390/genes10121037), 2019-12-12
Supplement: genes-10-01037-s001.pdf [file genes-10-01037-s001.pdf]

Supplementary

A

Genomic DNA / attP / loxP / Spacer

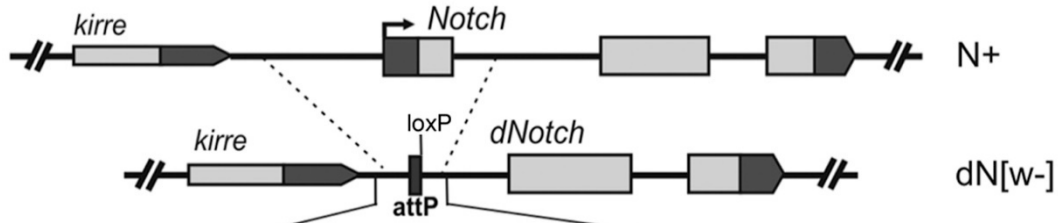

...ATGGCTGAGCTCGATGAGTTTCGCAGCGGTACCGTAGTGCCCCAACTGGGGTAACTTTG  
 AGTTCTCTCAGTTGGGGCGTAGTGTACCATAACTTCGTATAATGTATGCTATACGAAGTTA  
 TCACTAGTAAAGATCTCCATGCATAAAGCGCGCCATATGGAGCGGTCGTTGTCTAATCACT  
 G...

B

d4 / N<sup>fa-sw</sup>b / dfa-sw / [d1] / d2 / d3 / N exon1 TAD-Sexton TAD-Hou

**ClaI**

...GCAATTTAATCGATAAATCCCCAAGCCGCAAAAACTAAAAACAAAAAGATGTCCAAATATTGGTGATTTACGAGT  
 AAAGTGAATAAAATTAGAAAAACCACCAACATATATATATATATATATATATAGTTCCTCCACTTTCCAACCTTTTGG  
 ATCGGGTTTTCACTGGCACAGCATTTCAGCATCCATGTGAAAAGTTGAATATTTTTTTGTCTAGCCCTAAGCGCGTAA  
 ATGATATTTGAACTTAAATCAATTATGTAAAGAAGCAAAATGAAATATTGTATATCGTATATATATATATATATATAT  
 ATATATAGAGCATAAATGTGTATGTCAACGCTGAATTAATAAATGACTAGCTAAGATTAGAGAGAATGTTTAAAT  
 TTTTTTTTTTGTCTGCCTAGTTTAGGTTAAAGCCTATTTATAGACGTAAATGAAGAATTTTAAAGTAAAAAGAAAA  
 ACTTAAAAAGCTTAGAAACAATTTGTA AACATT

TGAGCGATCTACCAAAAAAAAAAAAAAAAAAAGCGCAATTAAGTGTAAGCGTTCAATTTTTAACACGAAATGCTGCCTTAT  
 GATTCCT

**PacI**

CGTTGGGTTCTTAATTCACTAAGCCAATACTGTAATTAATTAATACTAATTTATTGTTTCATATTTTATTTTTGTTTCTTT  
 CGAGAATATACATATGTATGTATTTATCTAAAGTAATTTCTGAAAATGCTTAAAAATAATGCCGTTTCGTTTAAACTG  
 ATTTATACACTCGAATCTAATTTCTATTCTTTCCGTGGGCAATTGCGCCGAGCTTTTAACTGGGATAGCGTTCCGAA  
 AATCGGAGATAAGTATGGTGTACATATTTTTTTTTGTTTTTCGATAATTGTCAAACGATTCAATTAAGCGTTCAATTA  
 TATAGACGTTACACACGAAACGAAATGAAATCAAATGAAATCCTATTAAGCCAAGTAAAGTATGATAATTGCAGG  
 AAGCGGAGTTGCGAAAA [AAAAAGGTACGGAAAAATGAAAACTAAGAACGTATTGCGGGAAAAACCTAACTTAAGTC  
 GAGAACAACCTCAAATTAGTTGAAATAAAGATACGAGAACAAGGAAAAATAAATACTTAAAAAATGCTACAAGT  
 GCGTTTTTCAATCAAAATTTATGCACATTTTTTTCCAGTGCCTACGAAATTTACATTGTCGAATTTACATTATACATAG  
 CGTAATTTCTACGAATCTTACATTGTCGAATTTACATTTACATAGCGTAATTTCTACAT]ACCGCTATGACGGCAC  
 TAAAGCGCCATTTCGGCGAAATGGGAAACTACTCATGCAAGCGGCTCGGAGC

**BssHII**

CCGGCTAACGTTATTGTTACCAACCGATCTCGCAACGCTGCGAAAAGAGCGCGCTGCCAAATGGCTCCCCGCCAT  
 ACGGTATCTTTTTCTGCACCGACGCGGTCACTGCCGATTTGAAAACAGATCGCTTTTTTCCAGTGGACGAAACGG  
 TTGTGAAAGCGGACGAGCGTTAGGCAGACGAACCTGGAAAGCGCAGAGCACAGTTCTCAACATTTATTTTTTTTTG

AATGTGTGTGCAACAACGCACGTAAAAATCGCGCTGCCAACAGGATATACAAACAAATCAATTACACAGCAAGCAAA  
 TGCAATGAAATGAAAAGGATGGCCCCAGCGGGAAAGCCGTTTCAGCAAGAGCAAGGAGTGCCTGTTCGAGGGATAG  
 CAACGAGAGAGCGACACAGAGAGCGAGA **XhoI**  
 GAGAGAGAGGGAGAGAAAACAAGGATTTTCGAAAAGTGTATCTACCTCGAG...

C

**wt** ...GAGCGCGCTGCC|AAAAATGGCTCCC... Viable  
**N<sup>fa-swb</sup>** ...GAGCGATCTA-AAACGCA|AAAAATGGCTCCC... Viable  
**dfa-swb<sup>LK</sup>** ...GAGCGATCTA-AAACGCA|AAAAATGGCTCCC... Viable  
**dfa-swb** ...GAGCGATCTAC|AATGGCTCCC... Lethal  
**d3** ...GTGCGTTTTTCAATCA|AATGGCTCCC... Viable

**Figure S1.** Nucleotide sequences of targeted mutations in the 5' end of *Notch* locus. (A) Scheme of the locus including the founder deletion dN replaced with the attP and loxP sites. The deleted region is pointed by vertical dashes. The sequences of the functional elements are shown in colored and shaded letters according to the legend (top). (B) Positions of the targeted mutations, exon 1, and formalized TAD boundary sites (Hou et al., 2012; Sexton et al., 2012) in this region are shown in colored and shaded letters according to the legend (top). Restriction sites are underlined. Putative CAT-box and transcription start sites are indicated by the double underline and wavy lines, respectively. (C) The genomic DNA junction sites of the deletions and viability of flies homozygous for these deletions in the absence of AEs are shown. The junction points of the deleted DNA sequences are shown with vertical lines; a putative CAT-box is underlined, its modified variants in deletions are marked with dashed underlines.

**Table S1.** Phenotypes alleles of *Notch* gene obtained

| Dominant alleles  | Phenotype of hemizygous males                    |                                                  |
|-------------------|--------------------------------------------------|--------------------------------------------------|
| dN[w+]            | lethal,<br>geterozygous females has nicked wings |                                                  |
| dN[w-]            | lethal,<br>geterozygous females is normal        |                                                  |
| Recessive alleles |                                                  | Phenotype of transgeterozygous females vs dN[w-] |
| N-resc[w-]        | +                                                | +                                                |
| d1[w-]            | +                                                | +                                                |
| d2[w-]            | +                                                | +                                                |
| d3[w-]            | +                                                | +                                                |
| d4[w-]            | +                                                | +                                                |
| N-resc[w+]        | R-, N                                            | R, VTN, Ma                                       |
| d1[w+]            | R-                                               | R, VTN, Ma                                       |
| d2[w+]            | +                                                | R, VTN, Ma                                       |
| d3[w+]            | RG                                               | RG, VTN, H, Ma, C                                |
| d4[w+]            | +                                                | R, VTN, Ma                                       |
| dfa-swb[w+]       | lehtal                                           | ND                                               |
| dfa-swb[w-]       | lehtal                                           | ND                                               |
| dfa-swbLK[w+]     | lehtal                                           | ND                                               |
| dfa-swbLK[w-]     | RG                                               | RG, VN, H, Ma, C                                 |

**Notes:** R= rough eyes; RG= rough and glossy eyes; H= phenotype "hairy" - extra and misaligned bristles on thorax and legs; Ma= additional bristles on the scutellum; V= thickened wing veins forming deltas at margin; T= gaps of triplo-row, N= nicked wings, C = curved tibia of hind legs; + indicates normal phenotype, - indicates the expression is slight or is variable, overlapping wild type.
